# Supplementary material for: High thermoelectric performance in complex phosphides enabled by stereochemically active lone pair electrons
Source: Royal Society of Chemistry journal article supplement (doi:10.1039/c8ta08448c), 2018-01-01
Supplement: c8ta08448c1.pdf [file c8ta08448c1.pdf]

## **Supporting Information**

### **High Thermoelectric Performance in Complex Phosphides**

### **Enabled by Stereochemically Active Lone Pair Electrons**

Xingchen Shen,<sup>a,f,†</sup> Yi Xia,<sup>b,†</sup> Guiwen Wang,<sup>c</sup> Fei Zhou,<sup>d</sup> Vidvuds Ozolins,<sup>e</sup> Xu Lu,<sup>a,\*</sup>

Guoyu Wang,<sup>f,\*</sup> Xiaoyuan Zhou,<sup>a,c,\*</sup>

<sup>a</sup> Chongqing Key Laboratory of Soft Condensed Matter Physics and Smart Materials, College of Physics, Chongqing University, Chongqing, Chongqing 401331, P. R. China

<sup>b</sup> Department of Materials Science and Engineering, Northwestern University, Evanston, IL 60208, USA

<sup>c</sup> Analytical and Testing Center of Chongqing University, Chongqing 401331, P. R. China

<sup>d</sup> Physical and Life Sciences Directorate, Lawrence Livermore National Laboratory, California 94550, USA

<sup>e</sup> Department of Applied Physics, Yale University, New Haven, Connecticut 06511, USA, and Energy Sciences Institute, Yale University, West Haven, Connecticut 06516, USA

<sup>f</sup> Chongqing Institute of Green and Intelligent Technology, Chinese Academy of Sciences Chongqing 400714, P. R. China and University of Chinese Academy of Sciences, Beijing, 100044, P. R. China

† X. S. and Y. X. contributed equally to this work.

\* Corresponding author: luxu@cqu.edu.cn; guoyuw@cigit.ac.cn; xiaoyuan2013@cqu.edu.cn

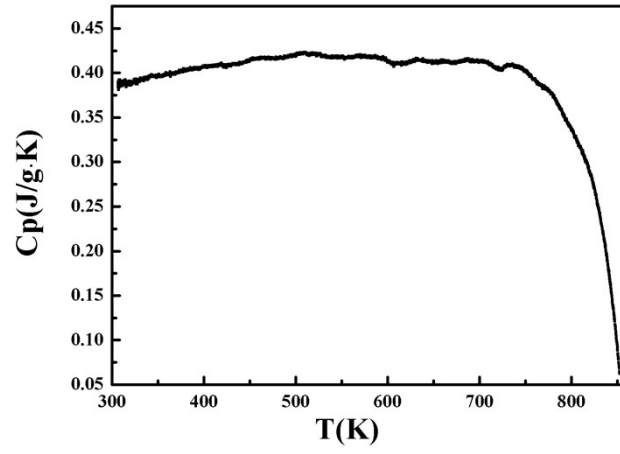

Fig. S1. Measured heat capacity of  $\text{Ag}_6\text{Ge}_{10}\text{P}_{12}$ .

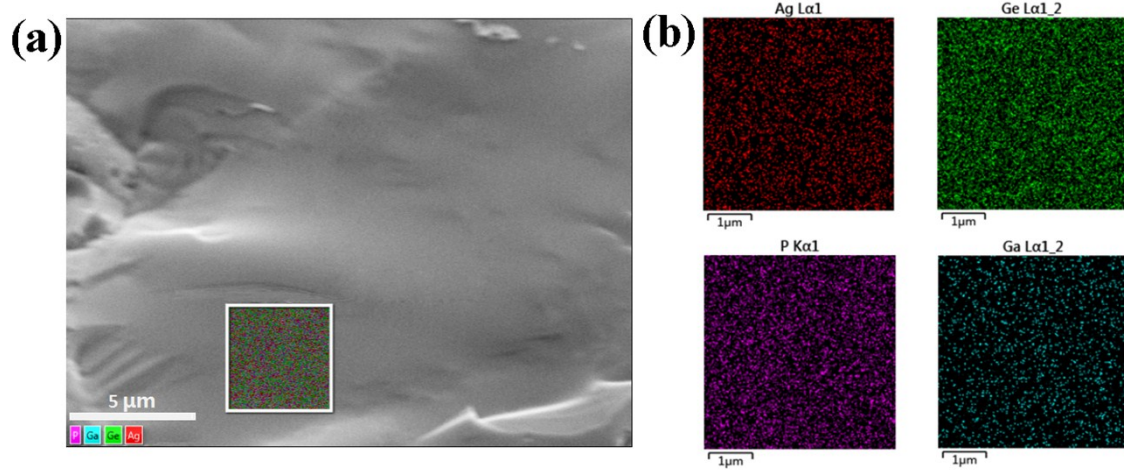

Fig. S2. (a, b) SEM-EDX elemental mapping images of the surface of

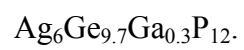

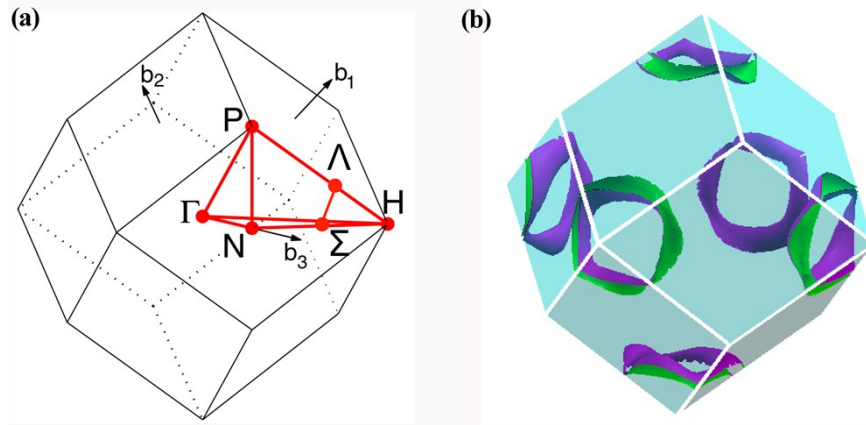

Fig. S3. (a) Brillouin zone of the bcc unit cell of  $\text{Ag}_6\text{Ge}_{10}\text{P}_{12}$ ; (b) Fermi surface of hole carriers for the Fermi level set at 50 meV below the VBM.

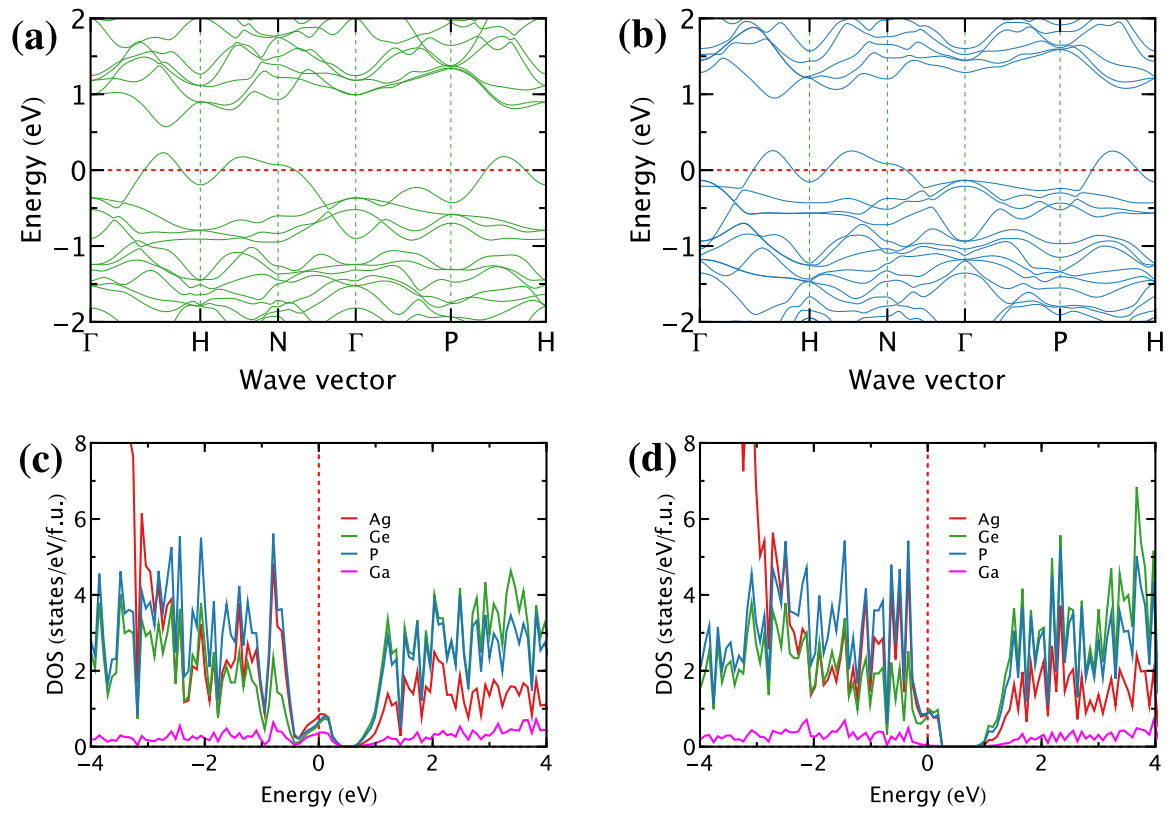

Fig. S4. (a) and (b) Band structure of  $\text{Ag}_6\text{Ge}_9\text{GaP}_{12}$ . (c) and (d) Atom-decomposed density of states of  $\text{Ag}_6\text{Ge}_9\text{GaP}_{12}$ . In (a) and (c) Ga substitutes Ge(1), while in (b) and (d) Ga substitutes Ge(2). The dashed red line indicates the Fermi level.

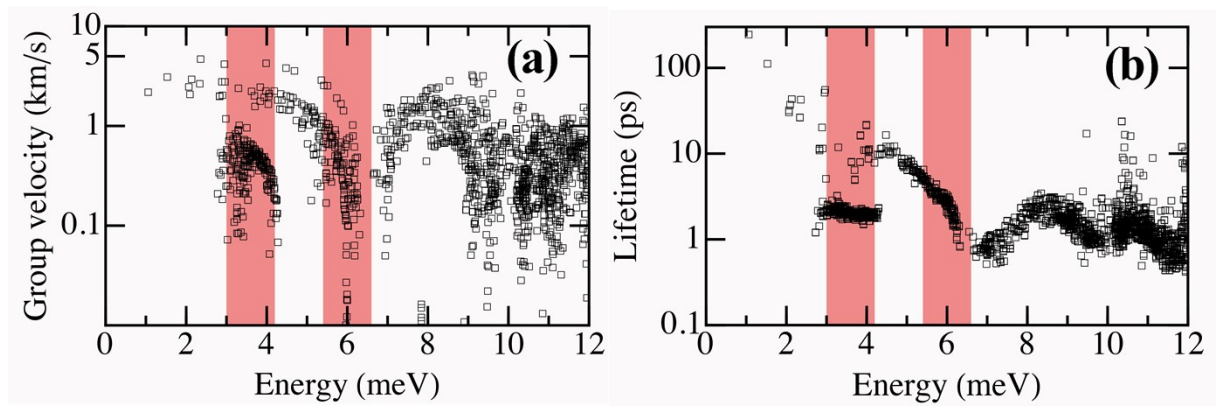

Fig. S5. (a) Calculated phonon mode group velocity; (b) Calculated phonon mode lifetime at 300 K.
